# Supplementary material
Source: MDPI journal article supplement (https://www.mdpi.com/2039-4713/13/3/32)
Supplement: s1 [file s1]

## Supplementary Information

# Effects of Chronic Roundup Exposure on Medaka Larvae

Deborah Killian <sup>1</sup>, Mehwish Faheem <sup>1,2</sup>, Beh Reh <sup>1</sup>, Xuegeng Wang <sup>1,3</sup> and Ramji Kumar Bhandari <sup>1,2,\*</sup>

<sup>1</sup> Department of Biology, University of North Carolina Greensboro, Greensboro, NC 27412, USA; wangxuegeng@scnu.edu.cn (X.W.)

<sup>2</sup> Division of Biological Sciences, University of Missouri, Columbia, MO 65211, USA

<sup>3</sup> Institute of Modern Aquaculture Science and Engineering, College of Life Sciences, South China Normal University, Guangzhou 510631, China

\* Correspondence: bhandarir@missouri.edu

**Table S1.** The sequences of the primers used in the present study. Primers were designed using the <https://useast.ensembl.org/index.html> and Primer3 software [36].

| Primer Name     | Sequence                |                        |
|-----------------|-------------------------|------------------------|
|                 | Forward                 | Reverse                |
| <i>ef1a</i>     | AGAAGGAAGCCGCTGAGATGG   | GCTCAGCCTTCAGTTTGTCCAA |
| <i>thr</i>      | AGGTGGATCTGGAAGCCTTC    | TCACAAGGCAGCTCAGAGAA   |
| <i>thr</i>      | TGAGGGTTGCAAGGGATTCT    | CGCACTTCCCCTCGTACTTA   |
| <i>tsh</i>      | CTCAAGGGACAGCAACATGAG   | TTGGACTCAAGGGGACAGC    |
| <i>thr a</i>    | CATGTTTTTCAGGGCTGCCTT   | CTCGCTTTCTGGATCGTAGC   |
| <i>ache</i>     | CTAGCAGGGGTCAAGATGGG    | TGTTCTCGTCCATCCAGTCC   |
| <i>mahce</i>    | AAGAAAATGGTCATGAAGCCCA  | GTCTTAGGGGCCAGCAGATC   |
| <i>dnmt1</i>    | CTTCTGCCGCTGGAAAGAC     | CCTCCTATCGGCGACCTG     |
| <i>bax</i>      | CTCAGAGGGTACGTGATTGAA   | CAGCTGCTCCACCACTTCTT   |
| <i>caspase3</i> | TCAGCCAAATCCCAGGTCTA    | AGGGTCGGCGTCTTGTTTTA   |
| <i>catalase</i> | GCGGTACAACAGCGCAGATGAAG | GGATGGACGGCCTTCAAGTTC  |
| <i>gst</i>      | CACGGCCATCCTGAAATACCT   | GTCAGCCGGAACCAATGAT    |
| <i>sod1</i>     | GGCACTCTGTATGCCGGCTGC   | GTTACCAAAGTCTCCCGGATG  |

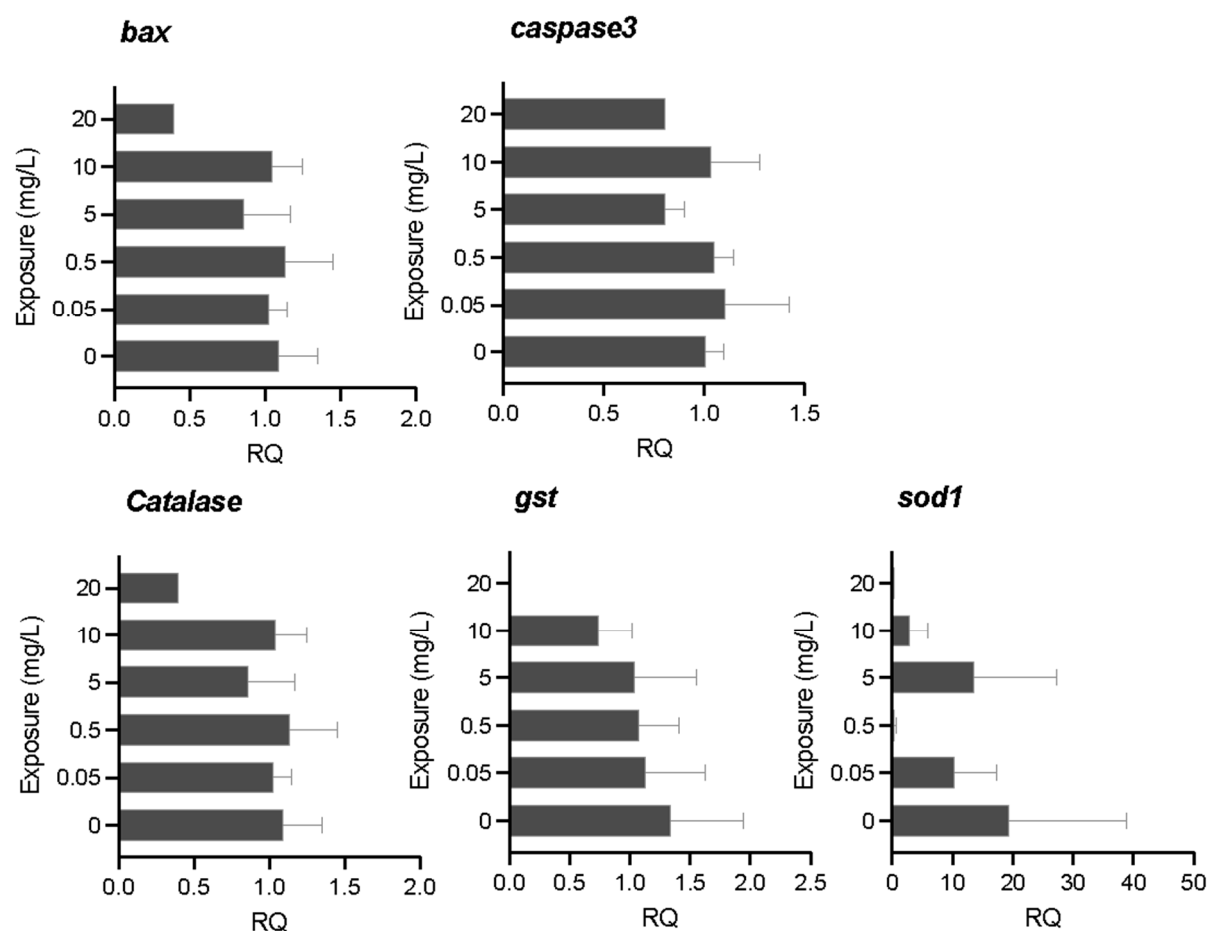

**Figure S1.** Expression of genes encoding *bax1*, *caspase3*, *catalase*, *gst*, and *sod1* in the whole larvae of medaka exposure to various concentrations of glyphosate in commercially available Roundup formulation. The mRNA levels were determined by real-time quantitative PCR using the primers shown in Table S1. No statistical significance was observed, although effects tended to be profound in larvae exposed to 20 mg/L of glyphosate.
